# Supplementary material
Source: bioRxiv or medRxiv preprint supplement (https://medrxiv.org/highwire/filestream/70807/field_highwire_adjunct_files/1/2019.12.19.19015255-2.pdf)
Supplement: Supplementary file [file 2019.12.19.19015255-2.pdf]

Supplemental

**Table e-1: Brain morphology measurement statistics for adults with NF1 and unaffected control participants.**

|                        | NF1                  |      |     | Control              |      |    | Adjusted p-value |
|------------------------|----------------------|------|-----|----------------------|------|----|------------------|
|                        | Average (cm)         | SD   | N   | Average (cm)         | SD   | N  |                  |
| <b>CORPUS CALLOSUM</b> |                      |      |     |                      |      |    |                  |
| Area                   | 7.16 cm <sup>2</sup> | 1.14 | 215 | 6.37 cm <sup>2</sup> | 0.91 | 57 | 4.1E-06          |
| Length                 | 7.55                 | 0.56 | 217 | 7.37                 | 0.45 | 57 | 7.4E-02          |
| Height                 | 2.78                 | 0.42 | 221 | 2.44                 | 0.27 | 57 | 4.6E-09          |
| Genu                   | 1.04                 | 0.18 | 221 | 1.15                 | 0.14 | 57 | 4.2E-05          |
| Ant-body               | 0.67                 | 0.13 | 224 | 0.58                 | 0.08 | 57 | 2.0E-08          |
| Mid-body               | 0.69                 | 0.10 | 223 | 0.60                 | 0.10 | 57 | 1.5E-07          |
| Post-body              | 0.47                 | 0.12 | 223 | 0.44                 | 0.07 | 57 | 5.2E-02          |
| Splenium               | 1.16                 | 0.17 | 219 | 1.18                 | 0.14 | 57 | 3.1E-01          |
| Bulbosity              | 2.60                 | 0.04 | 223 | 2.75                 | 0.06 | 57 | 6.1E-02          |
| <b>OCULAR GLOBES</b>   |                      |      |     |                      |      |    |                  |
| R AP                   | 2.34                 | 0.14 | 360 | 2.40                 | 0.14 | 95 | 3.1E-05          |
| L AP                   | 2.33                 | 0.14 | 361 | 2.40                 | 0.14 | 95 | 7.9E-05          |
| R Diameter             | 2.40                 | 0.12 | 360 | 2.41                 | 0.13 | 95 | 8.4E-01          |
| L Diameter             | 2.40                 | 0.12 | 361 | 2.41                 | 0.12 | 95 | 8.1E-01          |
| R Elongation           | 0.53                 | 0.02 | 360 | 0.53                 | 0.02 | 95 | 6.1E-02          |
| L Elongation           | 0.53                 | 0.02 | 361 | 0.53                 | 0.02 | 95 | 1.4E-01          |
| R Protrusion           | 0.68                 | 0.10 | 303 | 0.69                 | 0.10 | 95 | 8.3E-01          |
| L Protrusion           | 0.68                 | 0.10 | 289 | 0.69                 | 0.10 | 95 | 6.1E-01          |
| R ONT                  | 1.02                 | 0.02 | 349 | 1.01                 | 0.01 | 95 | 3.2E-02          |
| L ONT                  | 1.01                 | 0.03 | 343 | 1.01                 | 0.02 | 95 | 8.9E-01          |
| <b>BRAINSTEM</b>       |                      |      |     |                      |      |    |                  |
| Midbrain width         | 4.01                 | 0.31 | 181 | 3.73                 | 0.32 | 77 | 1.6E-10          |
| Midbrain AP            | 3.02                 | 0.20 | 182 | 2.87                 | 0.20 | 77 | 6.8E-07          |
| Pons AP                | 2.28                 | 0.21 | 342 | 2.14                 | 0.15 | 95 | 1.7E-10          |
| R MCP                  | 1.81                 | 0.18 | 338 | 1.65                 | 0.14 | 93 | 1.2E-14          |
| L MCP                  | 1.82                 | 0.19 | 335 | 1.66                 | 0.14 | 95 | 1.2E-14          |
| Medulla width          | 1.96                 | 0.14 | 319 | 1.76                 | 0.11 | 93 | 1.6E-26          |
| Medulla AP             | 1.71                 | 0.12 | 319 | 1.60                 | 0.10 | 93 | 1.2E-14          |

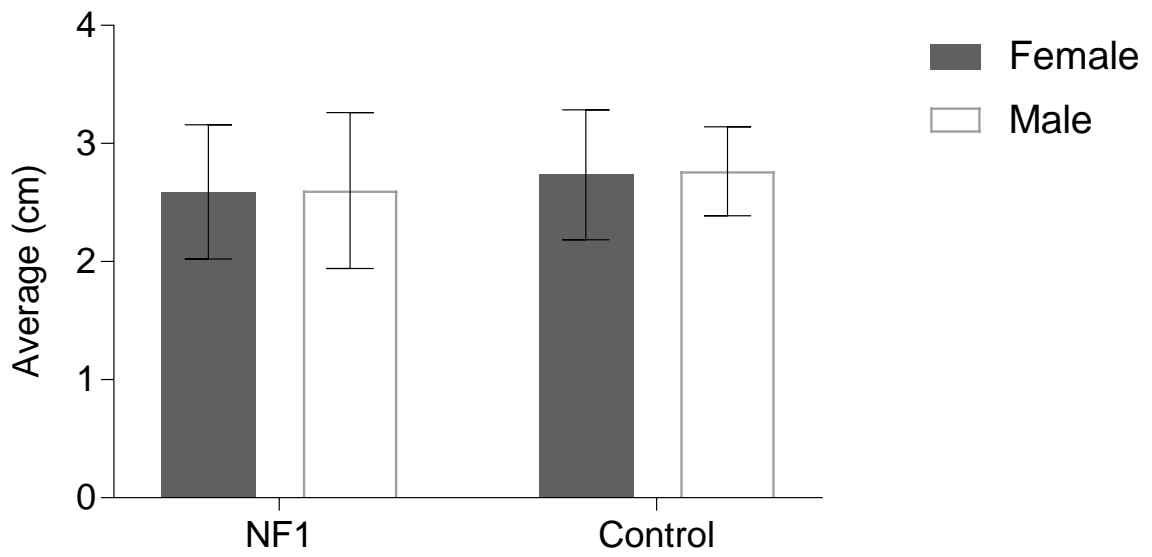

**Figure e-1: Corpus callosum bulbosity averages for adults with NF1 and unaffected control participants partitioned by sex.**

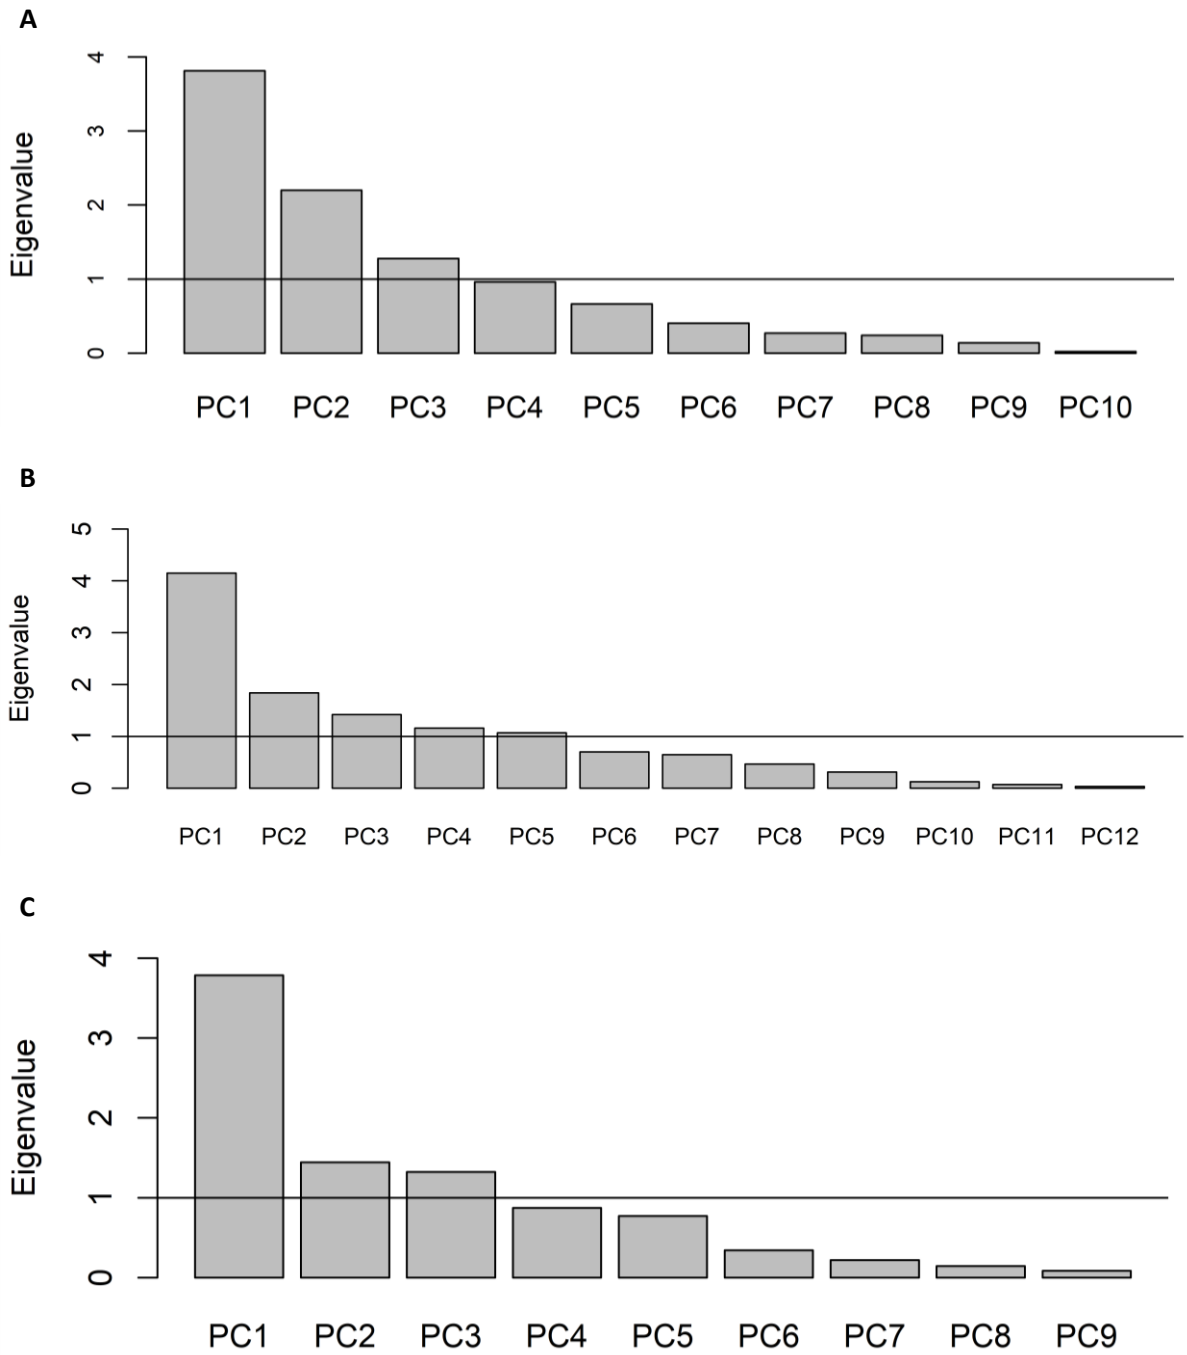

**Figure e-2: Scree plots of principal components of brain morphology measurements in adults with NF1.**

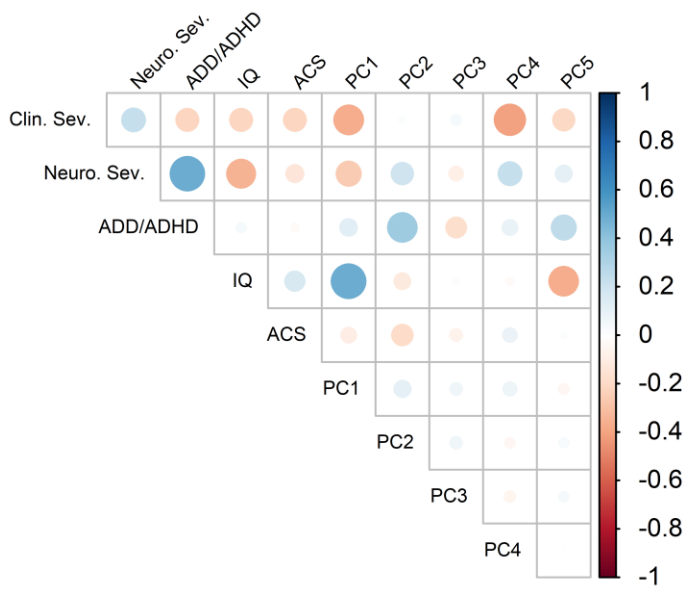

**Figure e-3: Correlation matrixes of ocular globe measurements with clinical and neuropsychometric assessments in adults with NF1.**

**Table e-2: Correlation values and p-values of corpus callosum measurements with clinical and neuropsychometric assessments in adults with NF1.**

| CORRELATION MATRIX |            |             |          |       |       |       |       |       |
|--------------------|------------|-------------|----------|-------|-------|-------|-------|-------|
|                    | Clin. Sev. | Neuro. Sev. | ADD/ADHD | IQ    | ACS   | PC1   | PC2   | PC3   |
| Clin. Sev.         | 1.00       | 0.14        | -0.49    | -0.29 | -0.17 | 0.38  | -0.05 | -0.02 |
| Neuro. Sev.        | 0.14       | 1.00        | 0.55     | 0.20  | -0.41 | 0.19  | -0.05 | 0.17  |
| ADD/ADHD           | -0.49      | 0.55        | 1.00     | 0.26  | -0.17 | 0.01  | -0.20 | -0.06 |
| IQ                 | -0.29      | 0.20        | 0.26     | 1.00  | 0.10  | -0.01 | -0.41 | 0.33  |
| ACS                | -0.17      | -0.41       | -0.17    | 0.10  | 1.00  | -0.22 | 0.23  | 0.08  |
| PC1                | 0.38       | 0.19        | 0.01     | -0.01 | -0.22 | 1.00  | -0.20 | -0.03 |
| PC2                | -0.05      | -0.05       | -0.20    | -0.41 | 0.23  | -0.20 | 1.00  | -0.09 |
| PC3                | -0.02      | 0.17        | -0.06    | 0.33  | 0.08  | -0.03 | -0.09 | 1.00  |
| P-values           |            |             |          |       |       |       |       |       |
| Clin. Sev.         | 0.00       | 0.91        | 0.03     | 0.50  | 0.47  | 0.19  | 0.60  | 0.33  |
| Neuro. Sev.        | 0.91       | 0.00        | 0.03     | 0.54  | 0.75  | 0.32  | 0.14  | 0.31  |
| ADD/ADHD           | 0.03       | 0.03        | 0.00     | 0.31  | 0.46  | 0.72  | 0.25  | 0.94  |
| IQ                 | 0.50       | 0.54        | 0.31     | 0.00  | 0.45  | 0.53  | 0.13  | 0.59  |
| ACS                | 0.47       | 0.75        | 0.46     | 0.45  | 0.00  | 0.13  | 0.32  | 0.89  |
| PC1                | 0.19       | 0.32        | 0.72     | 0.53  | 0.13  | 0.00  | 1.00  | 1.00  |
| PC2                | 0.60       | 0.14        | 0.25     | 0.13  | 0.32  | 1.00  | 0.00  | 1.00  |
| PC3                | 0.33       | 0.31        | 0.94     | 0.59  | 0.89  | 1.00  | 1.00  | 0.00  |

**Table e-3: Correlation values and p-values of brainstem measurements with clinical and neuropsychometric assessments in adults with NF1.**

| CORRELATION MATRIX |            |             |           |       |       |       |       |       |
|--------------------|------------|-------------|-----------|-------|-------|-------|-------|-------|
|                    | Clin. Sev. | Neuro. Sev. | ADD/ ADHD | IQ    | ACS   | PC1   | PC2   | PC3   |
| Clin. Sev.         | 1.00       | -0.06       | -0.56     | -0.24 | -0.13 | 0.21  | -0.17 | 0.21  |
| Neuro. Sev.        | -0.06      | 1.00        | 0.43      | -0.38 | -0.21 | -0.51 | -0.16 | -0.20 |
| ADD/ ADHD          | -0.56      | 0.43        | 1.00      | 0.24  | -0.06 | -0.49 | 0.32  | -0.31 |
| IQ                 | -0.24      | -0.38       | 0.24      | 1.00  | 0.35  | -0.17 | 0.33  | 0.17  |
| ACS                | -0.13      | -0.21       | -0.06     | 0.35  | 1.00  | 0.05  | 0.27  | 0.30  |
| PC1                | 0.21       | -0.51       | -0.49     | -0.17 | 0.05  | 1.00  | 0.01  | 0.18  |
| PC2                | -0.17      | -0.16       | 0.32      | 0.33  | 0.27  | 0.01  | 1.00  | 0.22  |
| PC3                | 0.21       | -0.20       | -0.31     | 0.17  | 0.30  | 0.18  | 0.22  | 1.00  |
| P-values           |            |             |           |       |       |       |       |       |
| Clin. Sev.         | 0.00       | 0.88        | 0.02      | 0.14  | 0.88  | 0.13  | 0.39  | 0.34  |
| Neuro. Sev.        | 0.88       | 0.00        | 0.09      | 0.01  | 0.52  | 0.02  | 0.19  | 0.48  |
| ADD/ ADHD          | 0.02       | 0.09        | 0.00      | 0.36  | 0.83  | 0.04  | 0.22  | 0.23  |
| IQ                 | 0.14       | 0.01        | 0.36      | 0.00  | 0.54  | 0.84  | 0.16  | 0.99  |
| ACS                | 0.88       | 0.52        | 0.83      | 0.54  | 0.00  | 0.86  | 0.61  | 0.07  |
| PC1                | 0.13       | 0.02        | 0.04      | 0.84  | 0.86  | 0.00  | 1.00  | 1.00  |
| PC2                | 0.39       | 0.19        | 0.22      | 0.16  | 0.61  | 1.00  | 0.00  | 1.00  |
| PC3                | 0.34       | 0.48        | 0.23      | 0.99  | 0.07  | 1.00  | 1.00  | 0.00  |

**Table e-4: Correlation values and p-values of ocular globe measurements with clinical and neuropsychometric assessments in adults with NF1.**

| CORRELATION MATRIX |            |             |          |       |       |       |       |       |       |       |
|--------------------|------------|-------------|----------|-------|-------|-------|-------|-------|-------|-------|
|                    | Clin. Sev. | Neuro. Sev. | ADD/ADHD | IQ    | ACS   | PC1   | PC2   | PC3   | PC4   | PC5   |
| Clin. Sev.         | 1.00       | 0.23        | -0.21    | -0.21 | -0.21 | -0.36 | 0.01  | 0.04  | -0.40 | -0.20 |
| Neuro. Sev.        | 0.23       | 1.00        | 0.49     | -0.34 | -0.13 | -0.25 | 0.20  | -0.08 | 0.23  | 0.11  |
| ADD/ADHD           | -0.21      | 0.49        | 1.00     | 0.04  | -0.03 | 0.13  | 0.36  | -0.18 | 0.10  | 0.26  |
| IQ                 | -0.21      | -0.34       | 0.04     | 1.00  | 0.16  | 0.50  | -0.11 | -0.01 | -0.02 | -0.36 |
| ACS                | -0.21      | -0.13       | -0.03    | 0.16  | 1.00  | -0.10 | -0.18 | -0.07 | 0.09  | 0.01  |
| PC1                | -0.36      | -0.25       | 0.13     | 0.50  | -0.10 | 1.00  | 0.12  | 0.06  | 0.08  | -0.05 |
| PC2                | 0.01       | 0.20        | 0.36     | -0.11 | -0.18 | 0.12  | 1.00  | 0.06  | -0.04 | 0.04  |
| PC3                | 0.04       | -0.08       | -0.18    | -0.01 | -0.07 | 0.06  | 0.06  | 1.00  | -0.05 | 0.04  |
| PC4                | -0.40      | 0.23        | 0.10     | -0.02 | 0.09  | 0.08  | -0.04 | -0.05 | 1.00  | 0.00  |
| PC5                | -0.20      | 0.11        | 0.26     | -0.36 | 0.01  | -0.05 | 0.04  | 0.04  | 0.00  | 1.00  |
| P-values           |            |             |          |       |       |       |       |       |       |       |
| Clin. Sev.         | 0.00       | 0.33        | 0.31     | 0.15  | 0.50  | 0.27  | 0.67  | 0.53  | 0.01  | 0.51  |
| Neuro. Sev.        | 0.33       | 0.00        | 0.01     | 0.00  | 0.79  | 0.86  | 0.95  | 0.92  | 0.44  | 0.81  |
| ADD/ADHD           | 0.31       | 0.01        | 0.00     | 0.84  | 0.96  | 0.71  | 0.07  | 0.39  | 0.41  | 0.34  |
| IQ                 | 0.15       | 0.00        | 0.84     | 0.00  | 0.94  | 0.08  | 0.67  | 0.56  | 0.83  | 0.47  |
| ACS                | 0.50       | 0.79        | 0.96     | 0.94  | 0.00  | 0.80  | 0.46  | 0.60  | 0.54  | 0.79  |
| PC1                | 0.27       | 0.86        | 0.71     | 0.08  | 0.80  | 0.00  | 1.00  | 1.00  | 1.00  | 1.00  |
| PC2                | 0.67       | 0.95        | 0.07     | 0.67  | 0.46  | 1.00  | 0.00  | 1.00  | 1.00  | 1.00  |
| PC3                | 0.53       | 0.92        | 0.39     | 0.56  | 0.60  | 1.00  | 1.00  | 0.00  | 1.00  | 1.00  |
| PC4                | 0.01       | 0.44        | 0.41     | 0.83  | 0.54  | 1.00  | 1.00  | 1.00  | 0.00  | 1.00  |
| PC5                | 0.51       | 0.81        | 0.34     | 0.47  | 0.79  | 1.00  | 1.00  | 1.00  | 1.00  | 0.00  |
